# Supplementary material for: Generalized Photo-Thermo-Microstretch Elastic Solid Semiconductor Medium Due To Excitation Process
Source: Research Square preprint supplement (doi:10.21203/rs.3.rs-392444/v1), 2021-04-16
Supplement: Supplementary file 1 [file 20a347d21d102abc5f192824.docx]

Geometry of the problem
